# Supplementary material for: A three-dimensional nitrogen-doped graphene framework decorated with an atomic layer deposited ultrathin V2O5 layer for lithium sulfur batteries with high sulfur loading
Source: Royal Society of Chemistry journal article supplement (doi:10.1039/d0ta04301j), 2020-01-01
Supplement: d0ta04301j1.pdf [file d0ta04301j1.pdf]

## Supporting Information

### **Three-dimensional nitrogen-doped graphene framework decorated with atomic layer deposited ultrathin V<sub>2</sub>O<sub>5</sub> layer for lithium sulfur battery with high sulfur loading**

Xiaowei Liu<sup>a</sup>, Zhaohuai Li<sup>a</sup>, Xiaobin Liao<sup>b</sup>, Xufeng Hong<sup>a</sup>, Yan Li<sup>b</sup>, Cheng Zhou<sup>a</sup>, Yan Zhao<sup>b</sup>, Xu Xu<sup>\*,a</sup> and Liqiang Mai<sup>\*,a</sup>

<sup>a</sup>State Key Laboratory of Advanced Technology for Materials Synthesis and Processing, International School of Materials Science and Engineering, Wuhan University of Technology, Wuhan 430070, Hubei, China.

<sup>b</sup>State Key Laboratory of Silicate Materials for Architectures, International School of Materials Science and Engineering, Wuhan University of Technology, Wuhan 430070, Hubei, China.

\*E-mail: xuxu@whut.edu.cn(X. Xu); mlq518@whut.edu.cn(L. Mai).

**Precursor:**  
**Vanadium(V) triisopropoxy oxide (VTIP)**

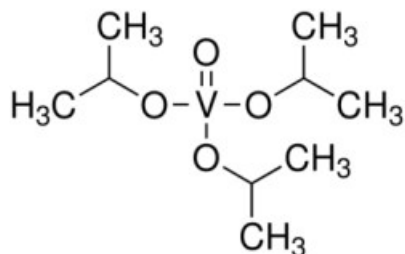

CAS Number:5588-84-1  
 Heated to 70 °C

|    | Instruction | # | Value |
|----|-------------|---|-------|
| 0  | Heater      | 9 | 150   |
| 1  | Heater      | 8 | 150   |
| 2  | Stabilize   | 9 |       |
| 3  | Stabilize   | 8 |       |
| 4  | Flow        |   | 20    |
| 5  | Wait        |   | 1800  |
| 6  | Flow        |   | 5     |
| 7  | Wait        |   | 2     |
| 8  | Stopvalve   |   | 0     |
| 9  | Pulse       | 1 | 0.15  |
| 10 | Wait        |   | 5     |
| 11 | Stopvalve   |   | 1     |
| 12 | Flow        |   | 20    |
| 13 | Wait        |   | 20    |
| 14 | Flow        |   | 5     |
| 15 | Wait        |   | 2     |
| 16 | Stopvalve   |   | 0     |
| 17 | Pulse       | 0 | 0.03  |
| 18 | Wait        |   | 5     |
| 19 | Stopvalve   |   | 0     |
| 20 | Flow        |   | 20    |
| 21 | Wait        |   | 20    |
| 22 | goto        | 6 | 100   |
| 23 | Flow        |   | 5     |

**Fig. S1.** Details about precursor and operation of ALD process.

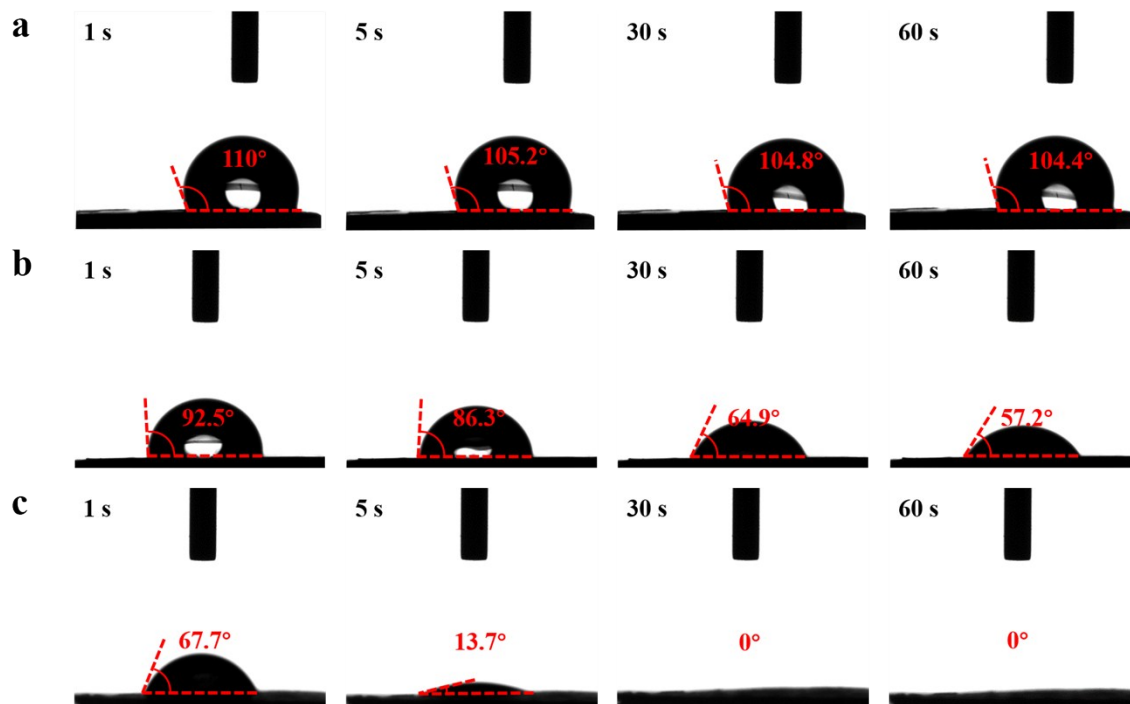

Fig. S2. Contact angle tests of (a) 3DG, (b) 3DNG, (c) 3DNG with plasma enhanced.

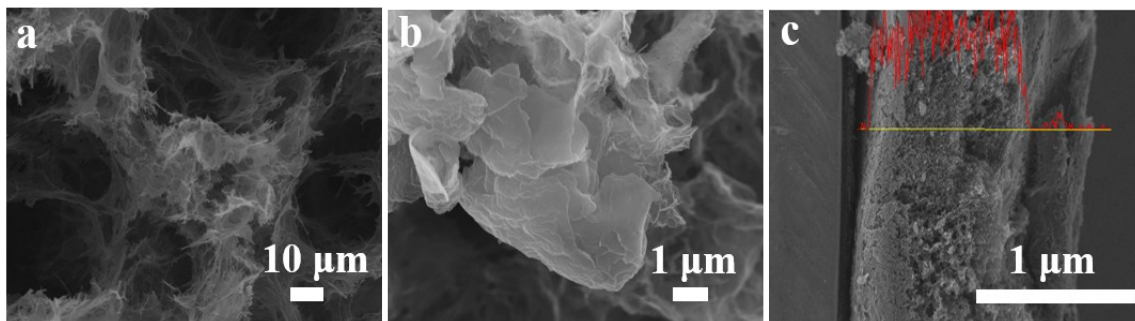

**Fig. S3.** (a, b) SEM images of TVO@3DNG, (c) element V linear analysis of TVO@3DNG.

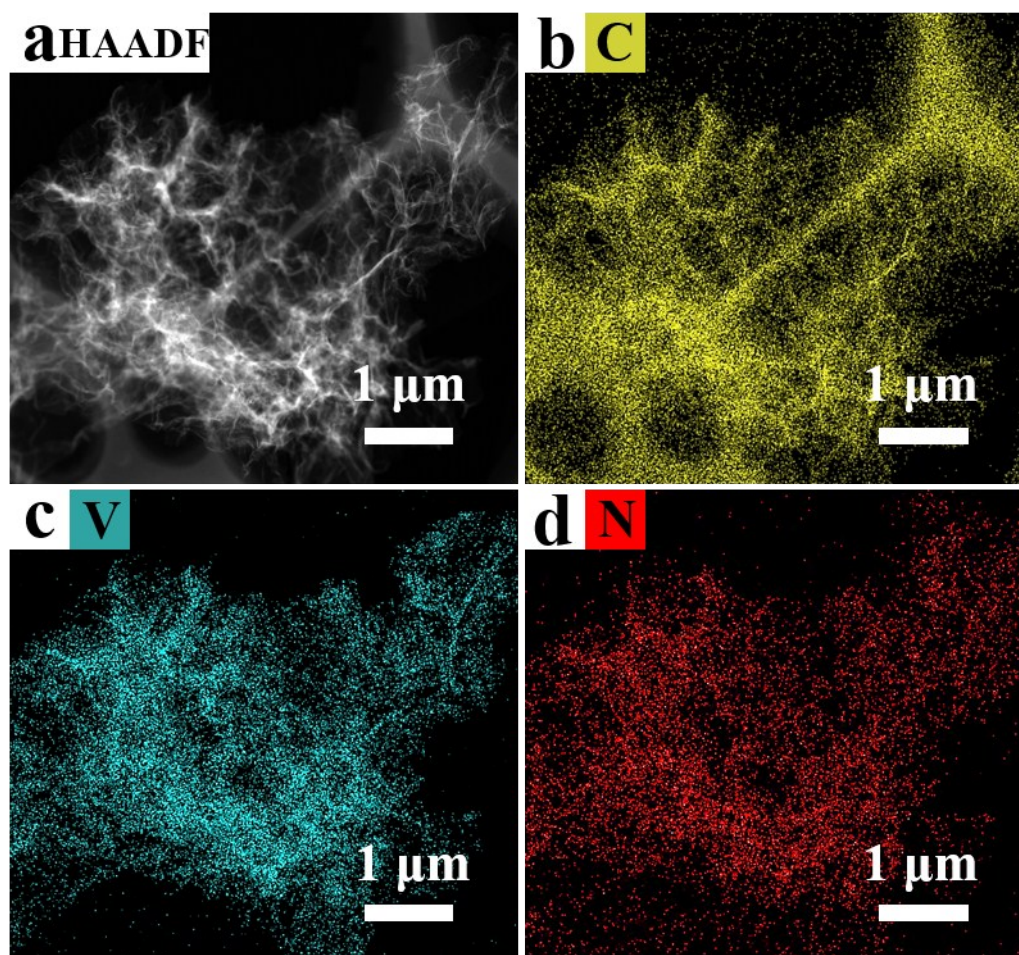

**Fig. S4.** TEM mapping analysis of the remaining elements of 100-ALDVO@3DNG cathode.

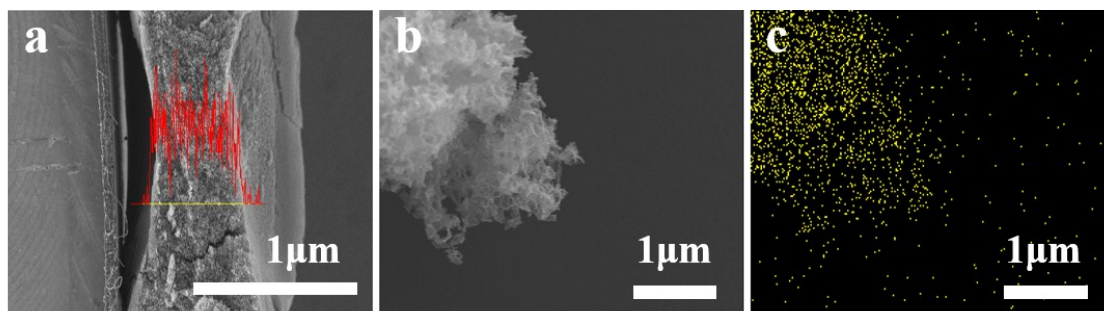

**Fig. S5.** (a) linear analysis in the cross section of 100-ALDVO@3DNG cathode. (b, c) V element EDS mapping analysis of 100-ALDVO@3DNG.

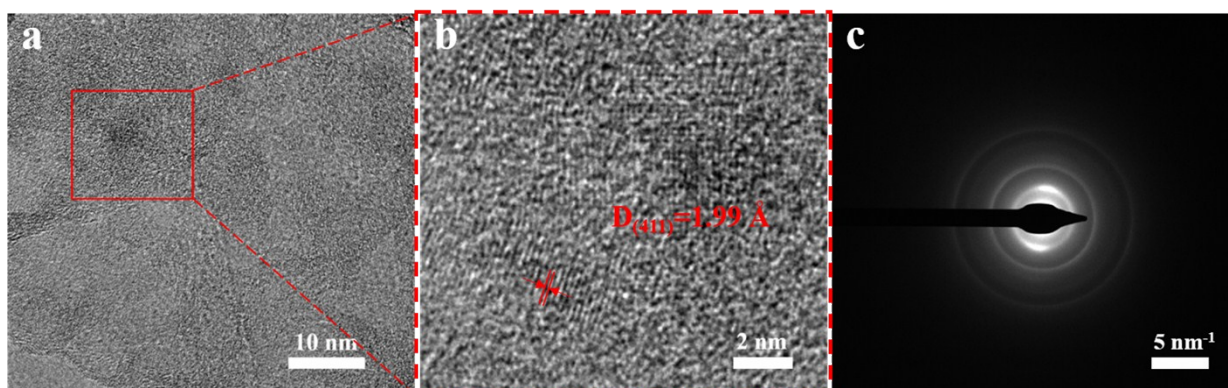

**Fig. S6.** (a) HRTEM image of 100-ALDVO@3DNG inner graphene surface, (b) enlarged image in red box of (a); (c) SEAD pattern of 100-ALDVO@3DNG.

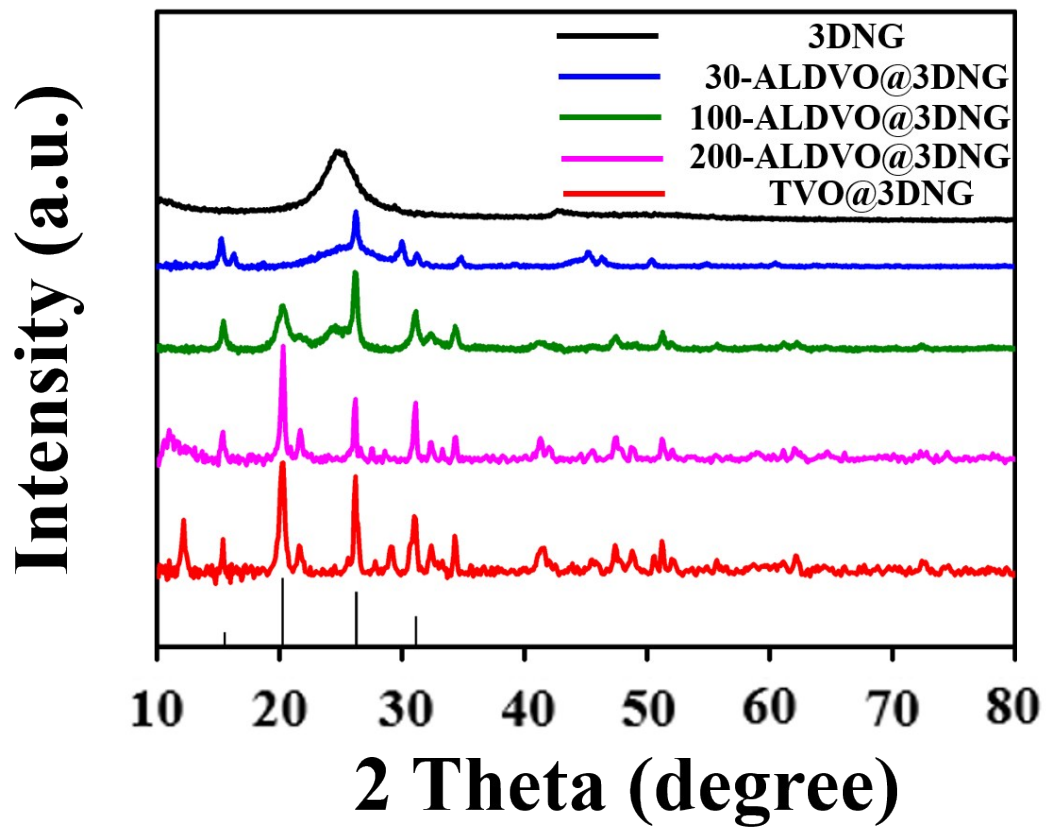

Fig. S7. Comparison of XRD curves of different samples.

**Table S1.** Electrochemical performance comparison of various ALD process applied in Li-S batteries.

| Materials                              | Rate (1 C=<br>1675 mA g <sup>-1</sup> ) | Capacity (mAh g <sup>-1</sup> ) | Ref.             |
|----------------------------------------|-----------------------------------------|---------------------------------|------------------|
| <b>V<sub>2</sub>O<sub>5</sub>/3DNG</b> | <b>0.2 C</b>                            | <b>1341.8(100 cycles)</b>       | <b>This Work</b> |
|                                        | <b>0.5 C</b>                            | <b>1102(100 cycles)</b>         |                  |
|                                        | <b>2 C</b>                              | <b>542(350 cycles)</b>          |                  |
|                                        | <b>3.86 mA cm<sup>-2</sup></b>          | <b>1204(Initial)</b>            |                  |
| Al <sub>2</sub> O <sub>3</sub> /C-S    | 0.5 C                                   | 646(100 cycles)                 | 33               |
|                                        | 2 C                                     | 540(Initial)                    |                  |
| V <sub>2</sub> O <sub>5</sub> /CNTs    | 0.1 C                                   | 1209(Initial)                   | 38               |
|                                        | 0.2 C                                   | 800(Initial)                    |                  |
| Al <sub>2</sub> O <sub>3</sub> /C      | 0.2 C                                   | 1136(Initial)                   | 34               |
| NG/S-TiO <sub>2</sub>                  | 0.1 C                                   | 1374(Initial)                   | 37               |
|                                        | 1 C                                     | 918.3 (500 cycles)              |                  |
| Al <sub>2</sub> O <sub>3</sub> /C      | 0.2 C                                   | 423                             | 32               |

**Table S2.** Comparison of areal capacity of the 100-ALDVO@3DNG cathode with that of recent publications in Li–S batteries which have high sulfur loadings more than 4 mg cm<sup>-2</sup>

| Mass loading (mg cm <sup>-2</sup> ) | Rate (mA cm <sup>-2</sup> ) | Areal capacity (mAh cm <sup>-2</sup> )    | Ref.             |
|-------------------------------------|-----------------------------|-------------------------------------------|------------------|
| <b>11.5</b>                         | <b>3.86</b>                 | <b>14.9(Initial)<br/>11.2(100 cycles)</b> | <b>This work</b> |
| 5                                   | 1.68                        | 5.1(Initial)<br>4(50 cycles)              | 52               |
| 8.1                                 | 3.4                         | 7.69(Initial)<br>6.8(50 cycles)           | 53               |
| 4.2                                 | 0.35<br>2                   | 4.8(Initial)<br>2.44(60 cycles)           | 54               |
| 10.2                                | 1                           | 10.8(Initial)<br>6.0(50 cycles)           | 55               |
| 5.4                                 | 4.52                        | 5.43(Initial)<br>4.3(200 cycles)          | 56               |
| 12                                  | 4.02                        | 10.2(Initial)<br>5.04(100 cycles)         | 57               |
| 10.02                               | 3.41                        | 6.52(Initial)<br>5.14(500 cycles)         | 58               |
| 4                                   | 5.8                         | 2.8(Initial)<br>2.08(500 cycles)          | 59               |
| 4                                   | 0.67                        | 3.33(Initial)<br>1.68(100 cycles)         | 60               |
| 4.2                                 | 0.7                         | 5.707(Initial)<br>4.09(160cycles)         | 61               |
| 6                                   | 1.01                        | 6.648(Initial)<br>4.25(200 cycles)        | 62               |
| 12.1                                | 4.05                        | 12.6(Initial)<br>11.1(30 cycles)          | 63               |
| 5                                   | 0.83                        | 4.87(Initial)<br>2.56(50 cycles)          | 64               |
| 8                                   | 2.68                        | 9.6(Initial)<br>7.72(60 cycles)           | 65               |
